# Supplementary material for: Polymorphisms and morphological studies of a difluorobenzothiadiazole conjugated copolymer with 7.8% polymer solar cell efficiency
Source: Royal Society of Chemistry journal article supplement (doi:10.1039/c4ta06228k), 2015-01-01
Supplement: c4ta06228k1.pdf [file c4ta06228k1.pdf]

## Supporting Information

### Polymorphisms and morphological studies of a difluorobenzothiadiazole conjugated copolymer with 7.8% Polymer Solar Cells Efficiency

*Chi-Feng Huang<sup>a</sup>, Jen-Yun Chang<sup>a</sup>, Sin-Hong Huang<sup>a</sup>, Kuan-Yi Wu<sup>a</sup>, Jyun-Fong Jheng<sup>a</sup>, Wei-Tsung Chuang<sup>b</sup>, Chain-Shu Hsu<sup>a</sup> and Chien-Lung Wang<sup>a,\*</sup>*

<sup>a</sup>Department of Applied Chemistry, National Chiao Tung University, 1001 Ta Hsueh Road Hsin-Chu, 30010 (Taiwan)

<sup>b</sup>National Synchrotron Radiation Research Center, 101 Hsin-Ann Road, Hsinchu Science Park, Hsinchu, 300, Taiwan

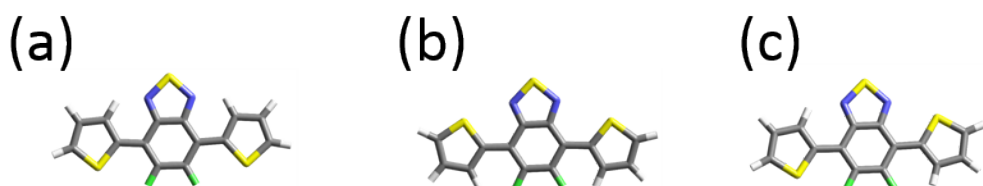

**Scheme S1.** Three possible conformations of Th<sub>2</sub>FBT: (a) *syn1*, (b) *syn2* and (c) *anti*-conformation.

**Table S1.** Crystal data and structure refinement for FBTTh<sub>4</sub>.

|                                   |                                                                             |                  |
|-----------------------------------|-----------------------------------------------------------------------------|------------------|
| Identification code               | ic16335                                                                     |                  |
| Empirical formula                 | C <sub>14</sub> H <sub>6</sub> F <sub>2</sub> N <sub>2</sub> S <sub>3</sub> |                  |
| Formula weight                    | 336.39                                                                      |                  |
| Temperature                       | 200(2) K                                                                    |                  |
| Wavelength                        | 1.54178 Å                                                                   |                  |
| Crystal system                    | Monoclinic                                                                  |                  |
| Space group                       | P2(1)/c                                                                     |                  |
| Unit cell dimensions              | a = 15.7727(9) Å                                                            | α = 90°.         |
|                                   | b = 4.8184(3) Å                                                             | β = 104.765(5)°. |
|                                   | c = 17.7825(8) Å                                                            | γ = 90°.         |
| Volume                            | 1306.83(13) Å <sup>3</sup>                                                  |                  |
| Z                                 | 4                                                                           |                  |
| Density (calculated)              | 1.710 Mg/m <sup>3</sup>                                                     |                  |
| Absorption coefficient            | 5.361 mm <sup>-1</sup>                                                      |                  |
| F(000)                            | 680                                                                         |                  |
| Crystal size                      | 0.25 x 0.15 x 0.10 mm <sup>3</sup>                                          |                  |
| Theta range for data collection   | 5.14 to 67.97°.                                                             |                  |
| Index ranges                      | -16 ≤ h ≤ 18, -5 ≤ k ≤ 5, -21 ≤ l ≤ 21                                      |                  |
| Reflections collected             | 4717                                                                        |                  |
| Independent reflections           | 2375 [R(int) = 0.0451]                                                      |                  |
| Completeness to theta = 67.97°    | 99.9 %                                                                      |                  |
| Absorption correction             | Semi-empirical from equivalents                                             |                  |
| Max. and min. transmission        | 1.00000 and 0.73034                                                         |                  |
| Refinement method                 | Full-matrix least-squares on F <sup>2</sup>                                 |                  |
| Data / restraints / parameters    | 2375 / 60 / 228                                                             |                  |
| Goodness-of-fit on F <sup>2</sup> | 1.140                                                                       |                  |
| Final R indices [I > 2σ(I)]       | R1 = 0.0641, wR2 = 0.1775                                                   |                  |
| R indices (all data)              | R1 = 0.0915, wR2 = 0.1914                                                   |                  |
| Largest diff. peak and hole       | 0.723 and -0.250 e.Å <sup>-3</sup>                                          |                  |

**Table S2.** Crystallographic Parameters of PTh<sub>4</sub>FBT

| <i>(hkl)</i><br>plane | Experimental <i>d</i> -spacing<br>(nm) | Theoretical <i>d</i> -spacing<br>(nm) |
|-----------------------|----------------------------------------|---------------------------------------|
| (100)                 | 2.022                                  | 2.022                                 |
| (200)                 | 1.011                                  | 1.008                                 |
| (300)                 | 0.674                                  | 0.671                                 |
| (400)                 | 0.505                                  | 0.504                                 |
| (020)                 | 0.37                                   | 0.369                                 |
| (005)                 | 0.40                                   | 0.399                                 |

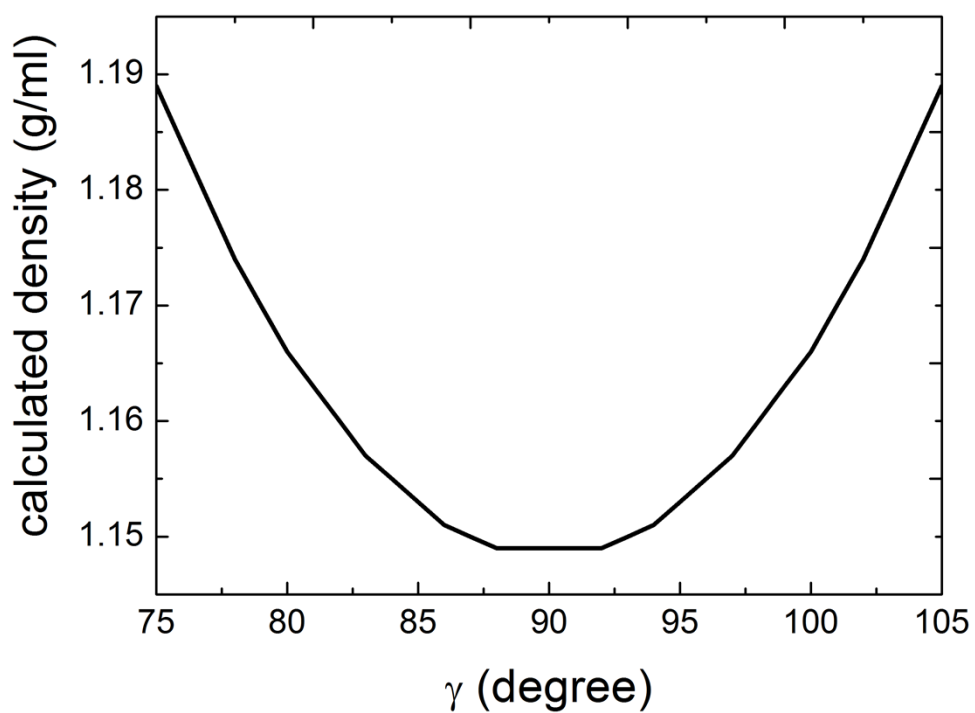**Figure S1.** Calculated density at different  $\gamma$ .

**Table S3.** Unit cell parameters of PTh<sub>4</sub>FBT (Mw=1033.88) and their calculated density.

| <i>a</i> (Å) | <i>b</i> (Å) | <i>c</i> (Å) | $\alpha$ | $\beta$ | $\gamma$ | <i>V</i> (Å <sup>3</sup> ) | <i>Z</i> | <i>d</i> (g/ml) |
|--------------|--------------|--------------|----------|---------|----------|----------------------------|----------|-----------------|
| 20.2         | 7.4          | 20           | 90       | 90      | 105      | 2887.73                    | 2        | 1.18            |
| 20.2         | 7.4          | 20           | 90       | 90      | 104      | 2900.80                    | 2        | 1.18            |
| 20.2         | 7.4          | 20           | 90       | 90      | 103      | 2912.98                    | 2        | 1.17            |
| 20.2         | 7.4          | 20           | 90       | 90      | 102      | 2924.27                    | 2        | 1.17            |
| 20.2         | 7.4          | 20           | 90       | 90      | 101      | 2934.67                    | 2        | 1.17            |
| 20.2         | 7.4          | 20           | 90       | 90      | 100      | 2944.18                    | 2        | 1.16            |
| 20.2         | 7.4          | 20           | 90       | 90      | 99       | 2952.79                    | 2        | 1.16            |
| 20.2         | 7.4          | 20           | 90       | 90      | 98       | 2960.51                    | 2        | 1.16            |
| 20.2         | 7.4          | 20           | 90       | 90      | 97       | 2967.32                    | 2        | 1.15            |
| 20.2         | 7.4          | 20           | 90       | 90      | 96       | 2973.22                    | 2        | 1.15            |
| 20.2         | 7.4          | 20           | 90       | 90      | 95       | 2978.22                    | 2        | 1.15            |
| 20.2         | 7.4          | 20           | 90       | 90      | 94       | 2982.32                    | 2        | 1.15            |
| 20.2         | 7.4          | 20           | 90       | 90      | 93       | 2985.50                    | 2        | 1.15            |
| 20.2         | 7.4          | 20           | 90       | 90      | 92       | 2987.78                    | 2        | 1.14            |
| 20.2         | 7.4          | 20           | 90       | 90      | 91       | 2989.14                    | 2        | 1.14            |
| 20.2         | 7.4          | 20           | 90       | 90      | 90       | 2989.60                    | 2        | 1.14            |
| 20.2         | 7.4          | 20           | 90       | 90      | 89       | 2989.14                    | 2        | 1.14            |
| 20.2         | 7.4          | 20           | 90       | 90      | 88       | 2987.78                    | 2        | 1.14            |
| 20.2         | 7.4          | 20           | 90       | 90      | 87       | 2985.50                    | 2        | 1.15            |
| 20.2         | 7.4          | 20           | 90       | 90      | 86       | 2982.32                    | 2        | 1.15            |
| 20.2         | 7.4          | 20           | 90       | 90      | 85       | 2978.22                    | 2        | 1.15            |
| 20.2         | 7.4          | 20           | 90       | 90      | 84       | 2973.22                    | 2        | 1.15            |
| 20.2         | 7.4          | 20           | 90       | 90      | 83       | 2967.32                    | 2        | 1.15            |
| 20.2         | 7.4          | 20           | 90       | 90      | 82       | 2960.51                    | 2        | 1.16            |
| 20.2         | 7.4          | 20           | 90       | 90      | 81       | 2952.79                    | 2        | 1.16            |
| 20.2         | 7.4          | 20           | 90       | 90      | 80       | 2944.18                    | 2        | 1.16            |
| 20.2         | 7.4          | 20           | 90       | 90      | 79       | 2934.67                    | 2        | 1.17            |
| 20.2         | 7.4          | 20           | 90       | 90      | 78       | 2924.27                    | 2        | 1.17            |
| 20.2         | 7.4          | 20           | 90       | 90      | 77       | 2912.98                    | 2        | 1.17            |
| 20.2         | 7.4          | 20           | 90       | 90      | 76       | 2900.80                    | 2        | 1.18            |
| 20.2         | 7.4          | 20           | 90       | 90      | 75       | 2887.73                    | 2        | 1.18            |
